# Supplementary material for: H3PW12O40supported on functionalized polyoxometalate organic–inorganic hybrid nanoparticles as efficient catalysts for three-component Mannich-type reactions in water
Source: Royal Society of Chemistry journal article supplement (doi:10.1039/c6ra27519b), 2017-01-01
Supplement: c6ra27519b1.pdf [file c6ra27519b1.pdf]

**Supporting Information for**  
**H<sub>3</sub>PW<sub>12</sub>O<sub>40</sub> supported on Functionalized Polyoxometalates Organic–**  
**Inorganic Hybrids Nanoparticles as efficient catalysts for three-component**  
**Mannich-type reactions in water**

Roushan Khoshnavazi<sup>a\*</sup>, Leila Bahrami,<sup>a</sup> Forugh Havasi,<sup>a</sup> Elham Naseri<sup>a</sup>

<sup>a</sup>*Department of chemistry, University of Kurdistan P.O. Box 66135-416, Sanandaj, Iran*

FT-IR, <sup>1</sup>H NMR, <sup>13</sup>C NMR and Mass spectra of new organic products

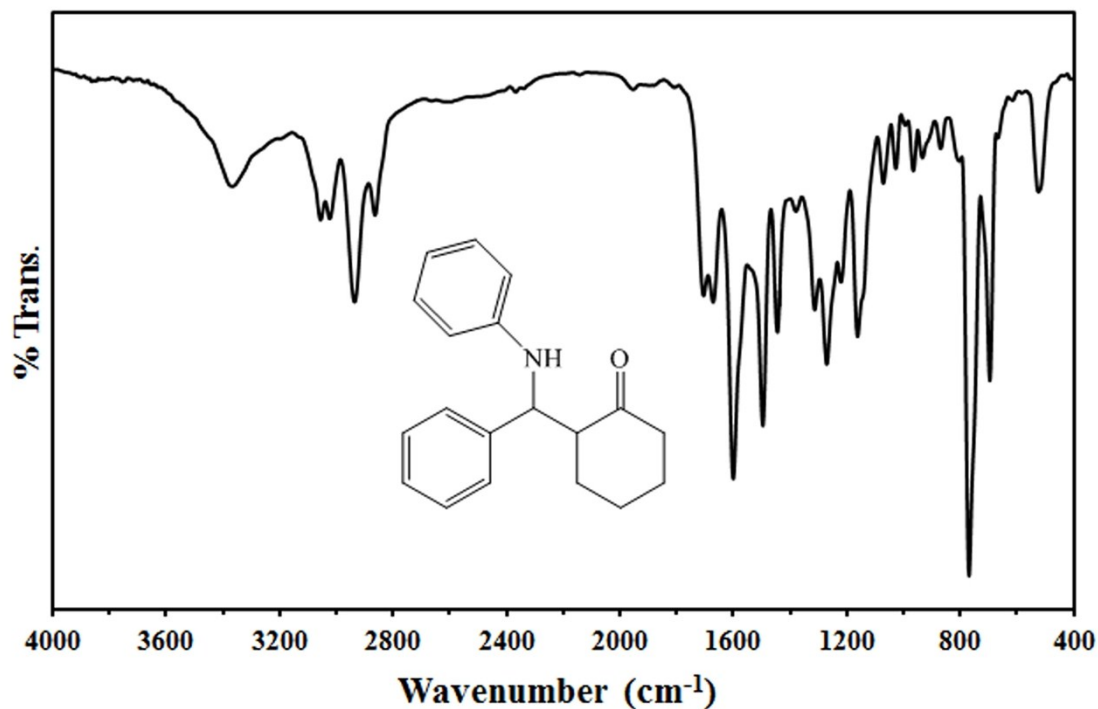

---

\*Corresponding Author: *E-mail address* :  
[r.khoshnavazi@uok.ac.ir](mailto:r.khoshnavazi@uok.ac.ir), [khoshnavazi@yahoo.com](mailto:khoshnavazi@yahoo.com),  
(R. Khoshnavazi)  
Fax/Tel: +98 871 6624133

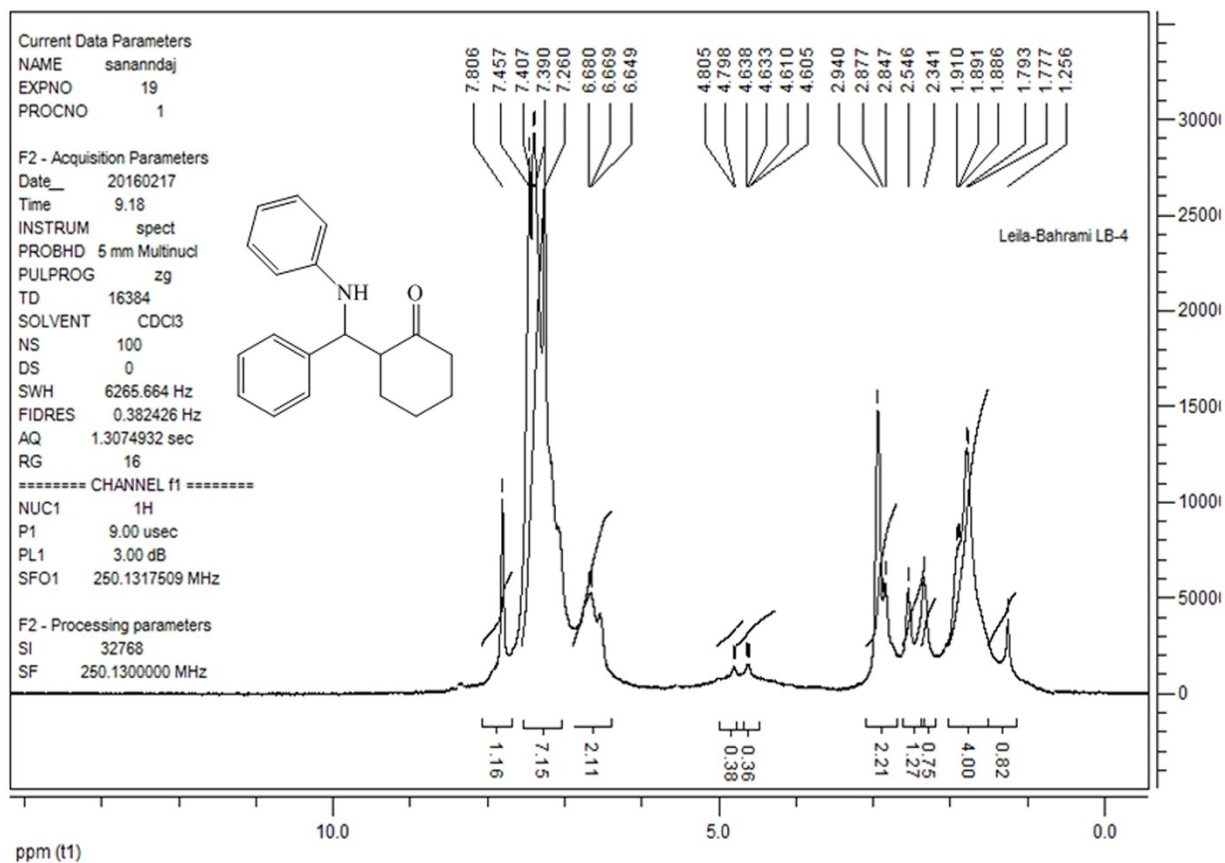

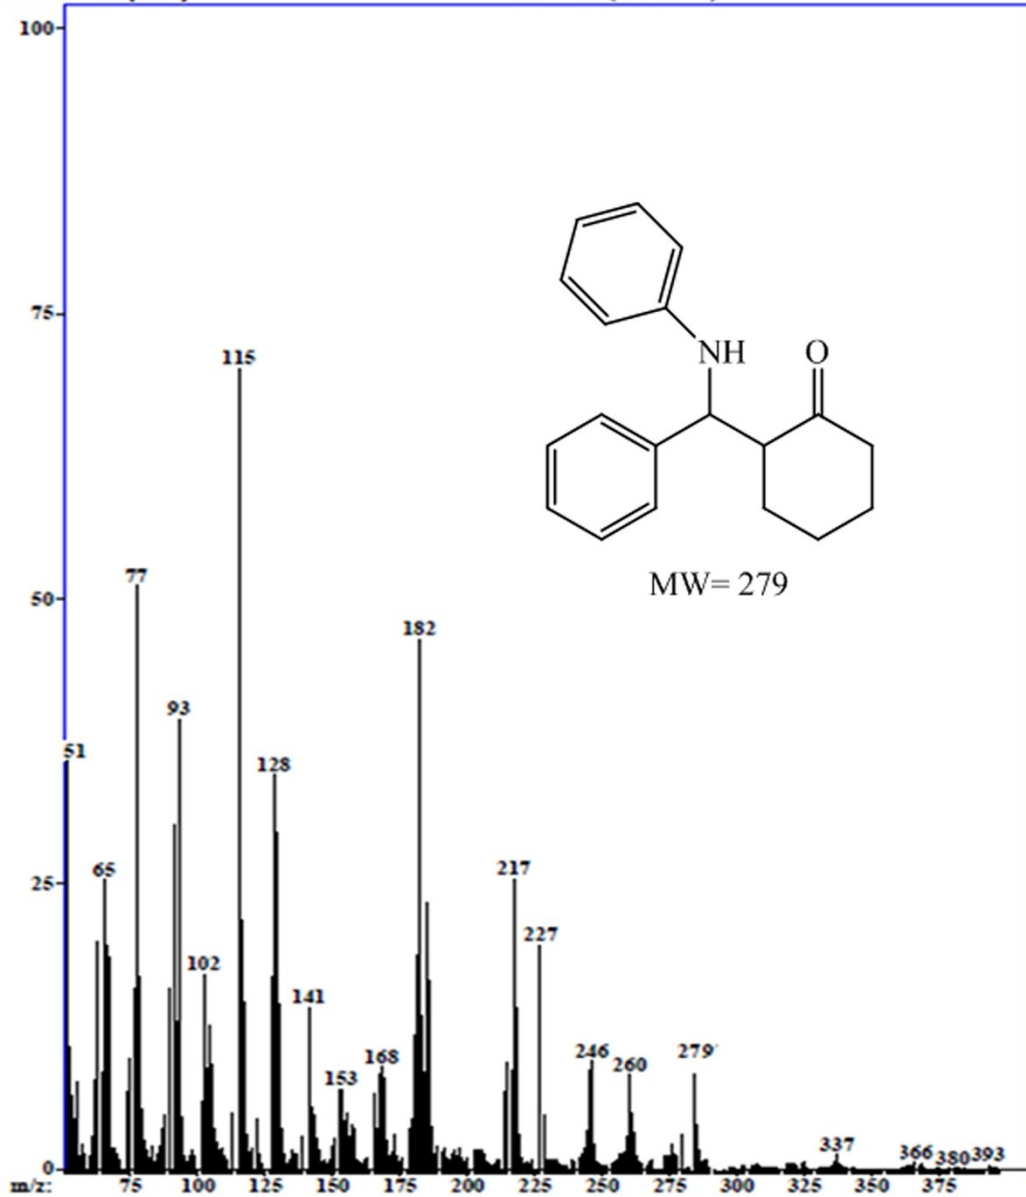

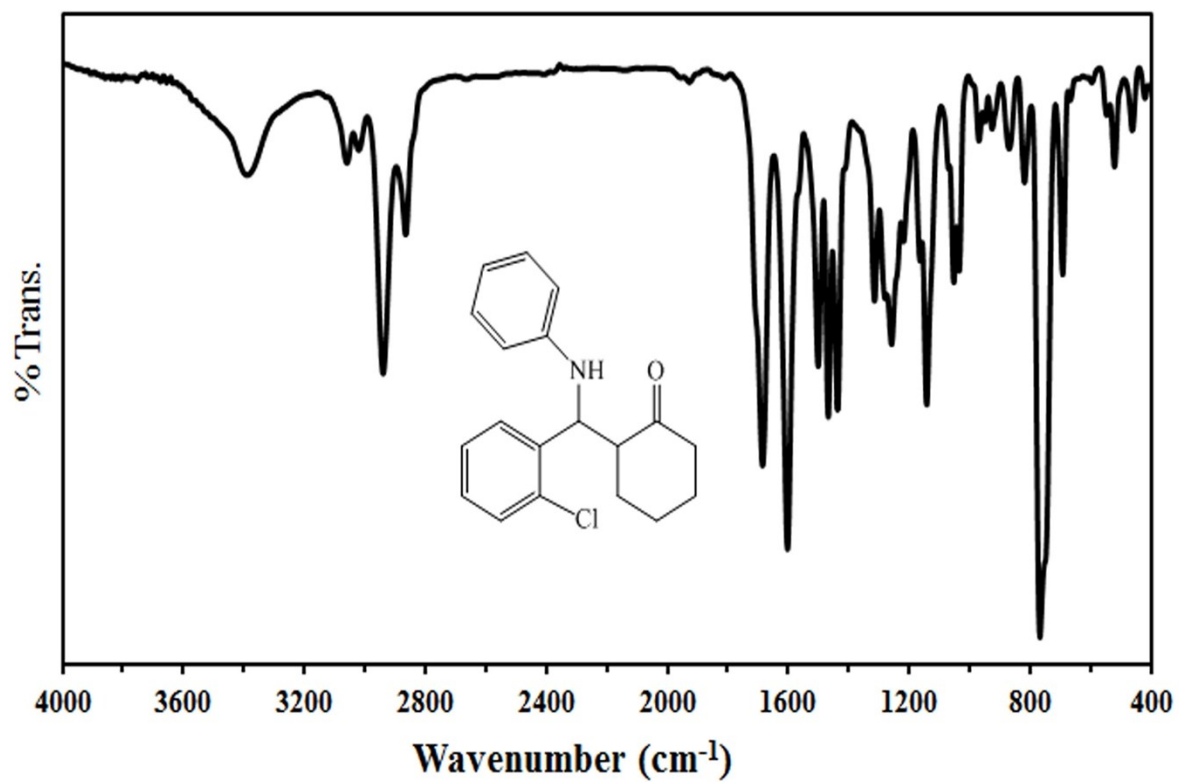

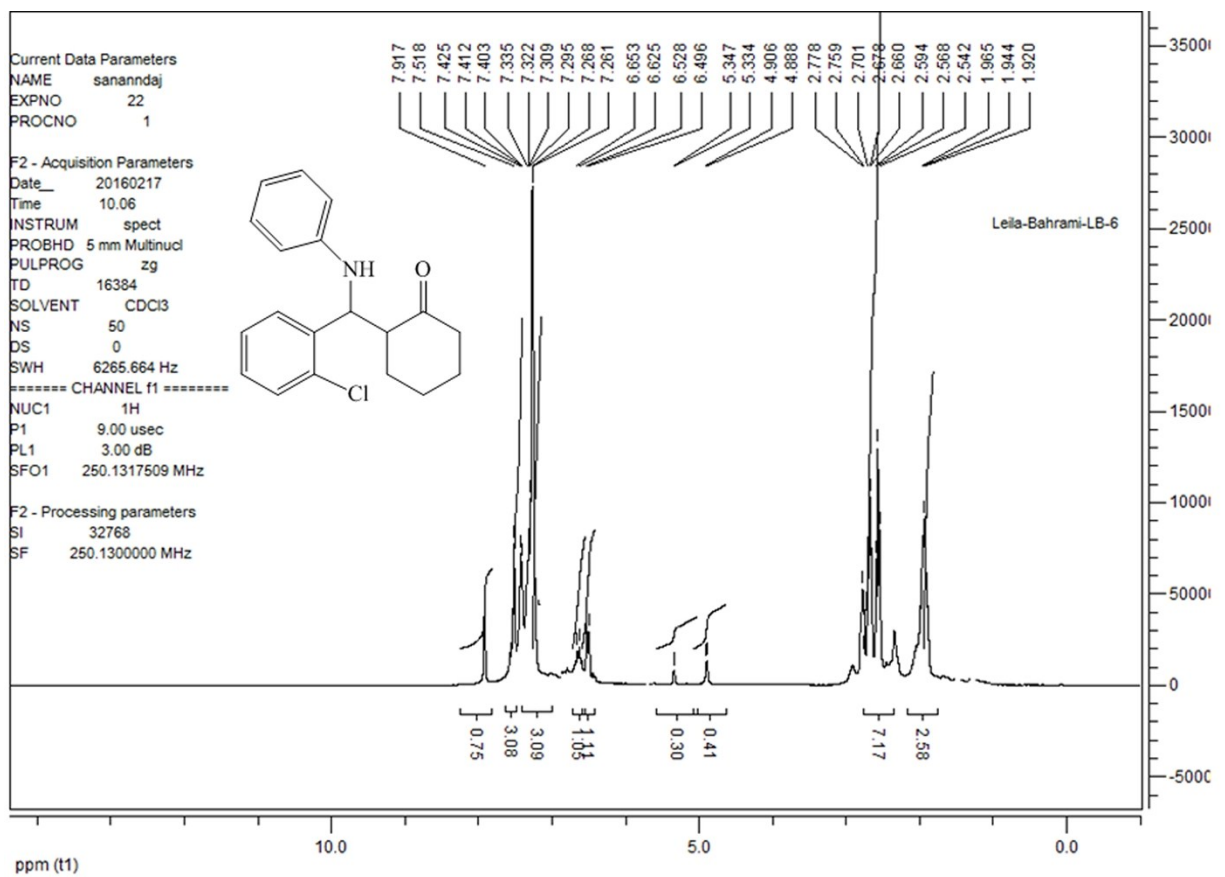

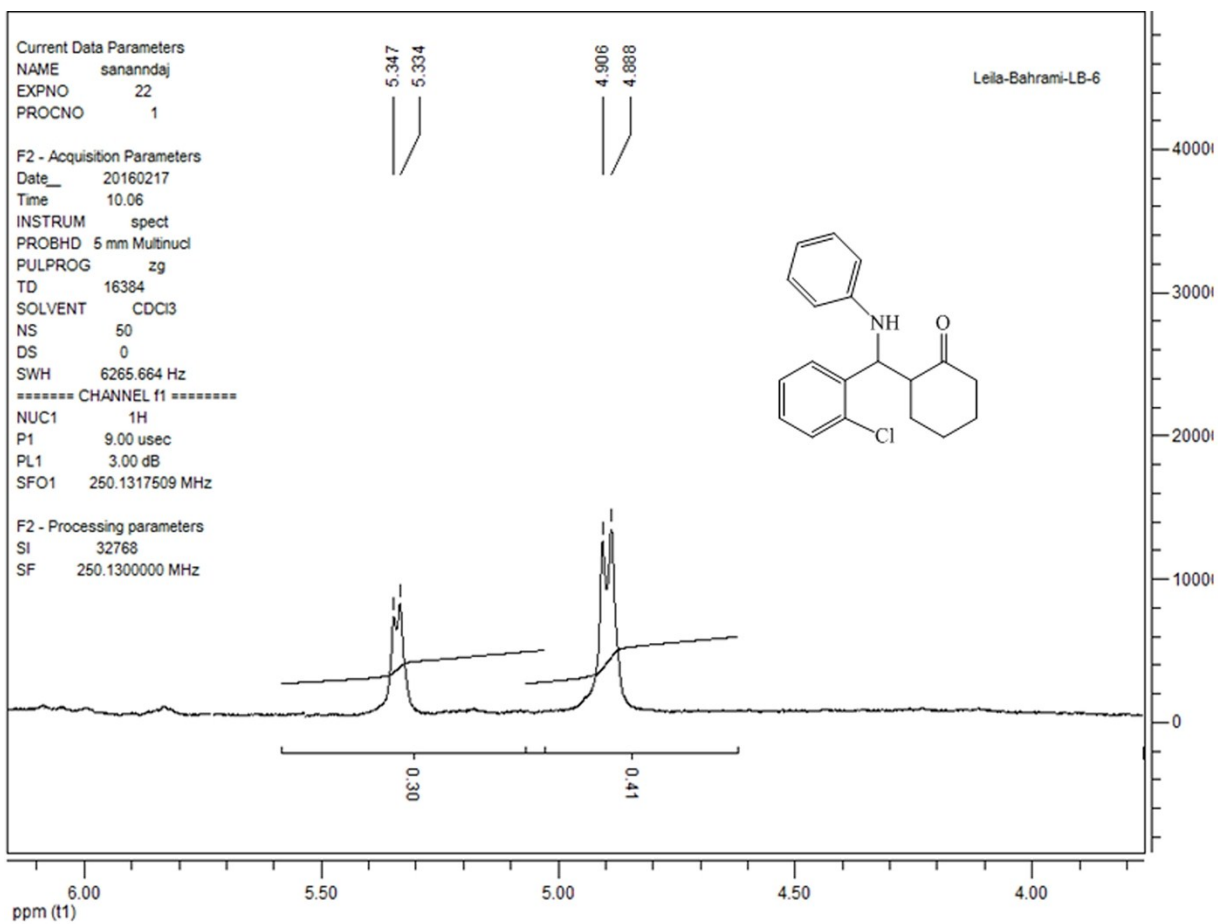

Abundance [20763]

Scan 90 (0.939 min)

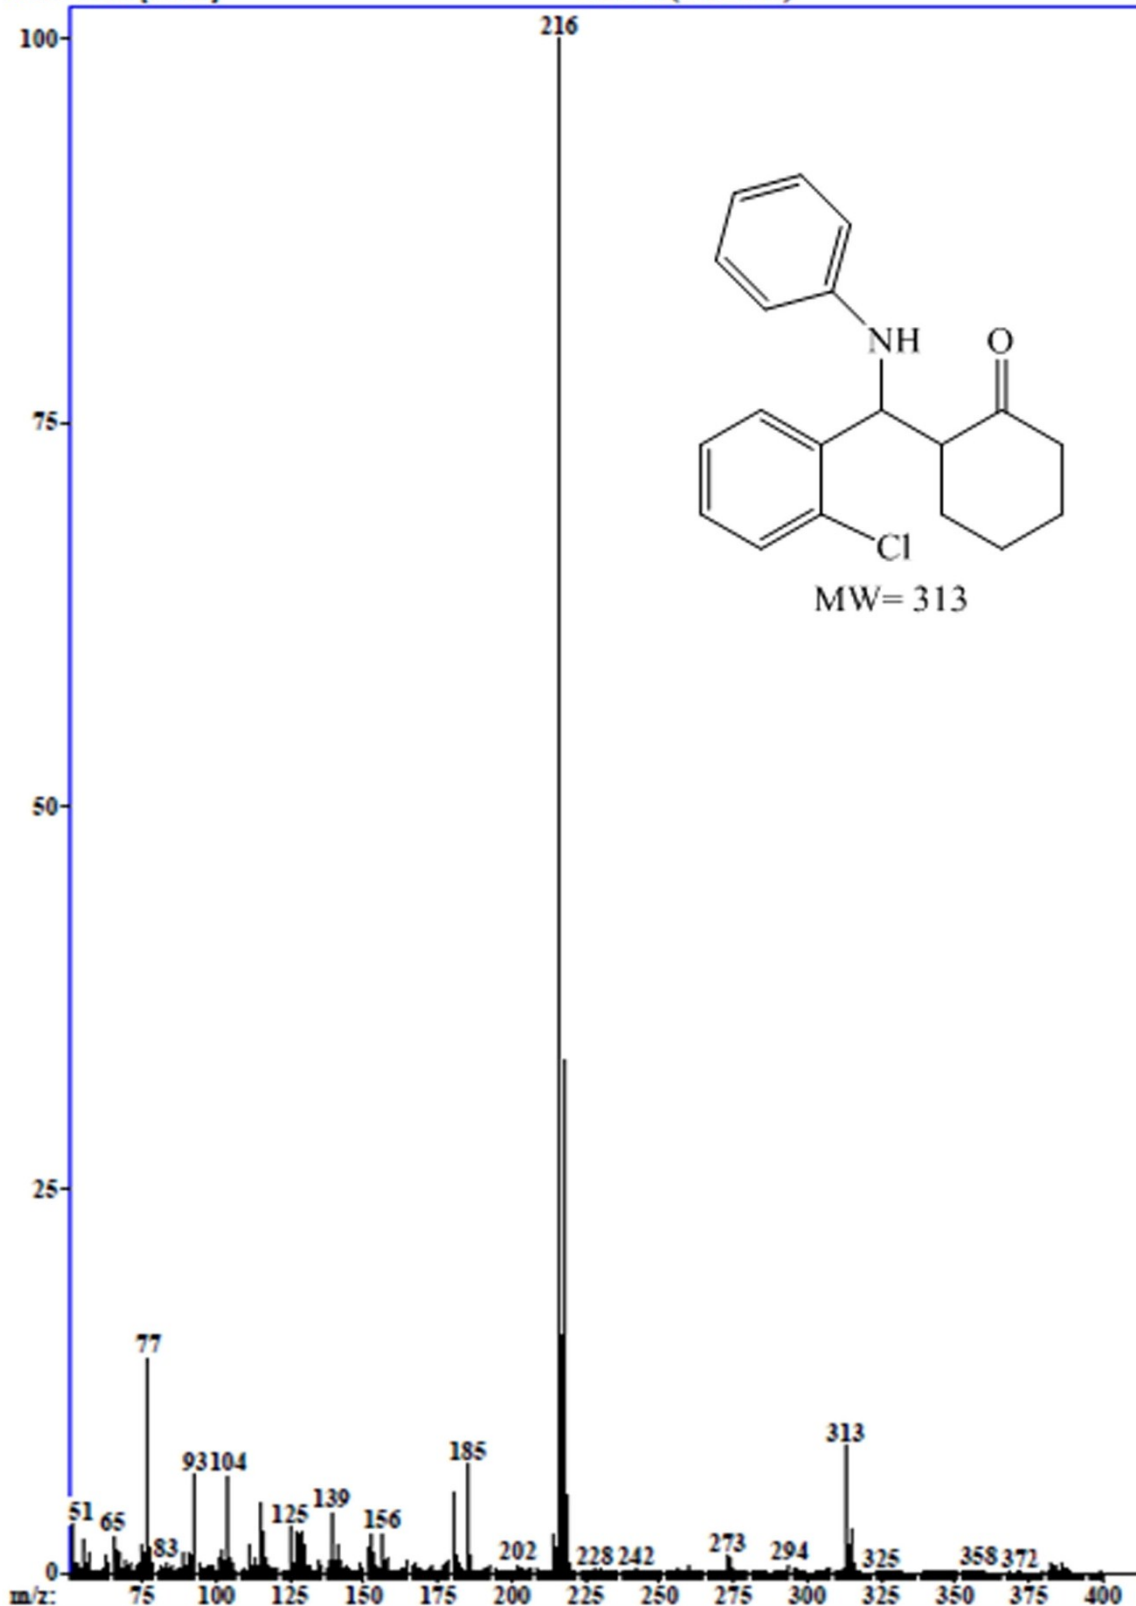

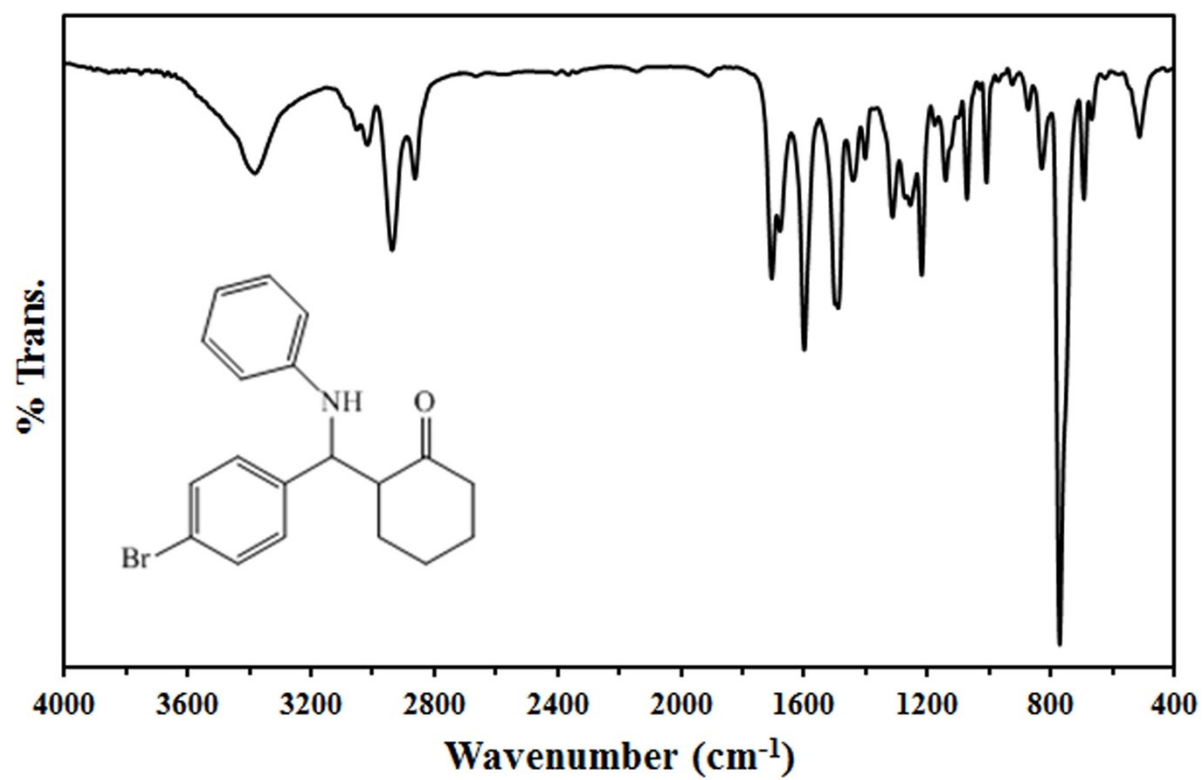



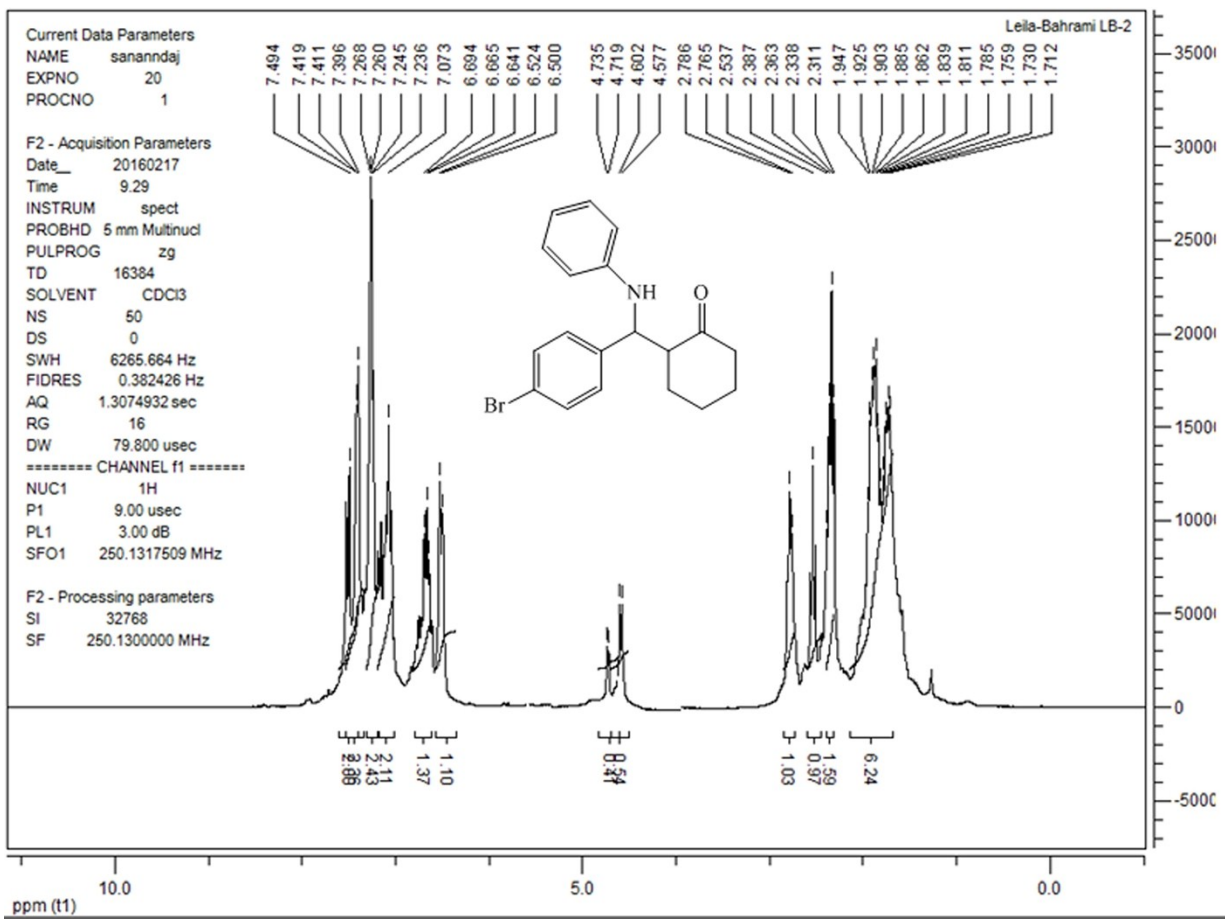

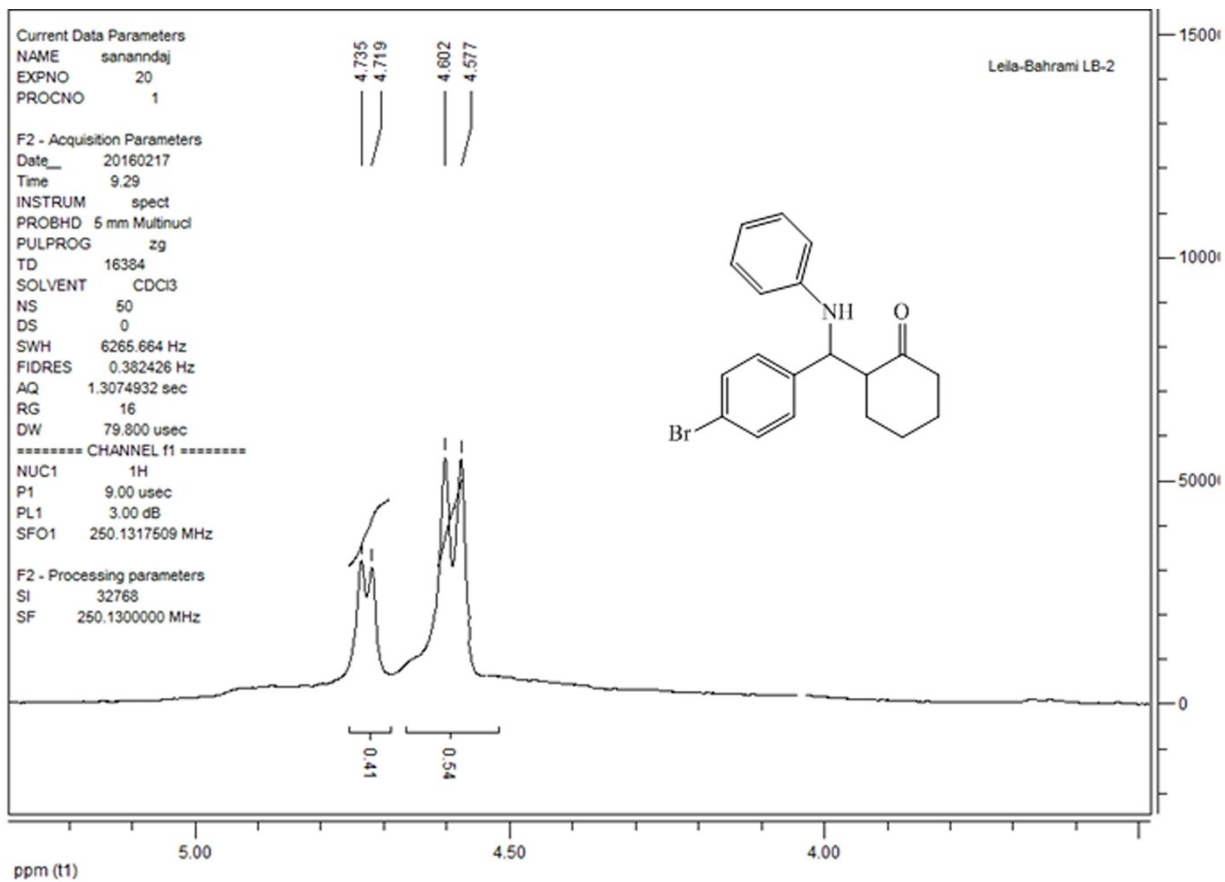

Abundance [2558]

Scan 106 (1.090 min)

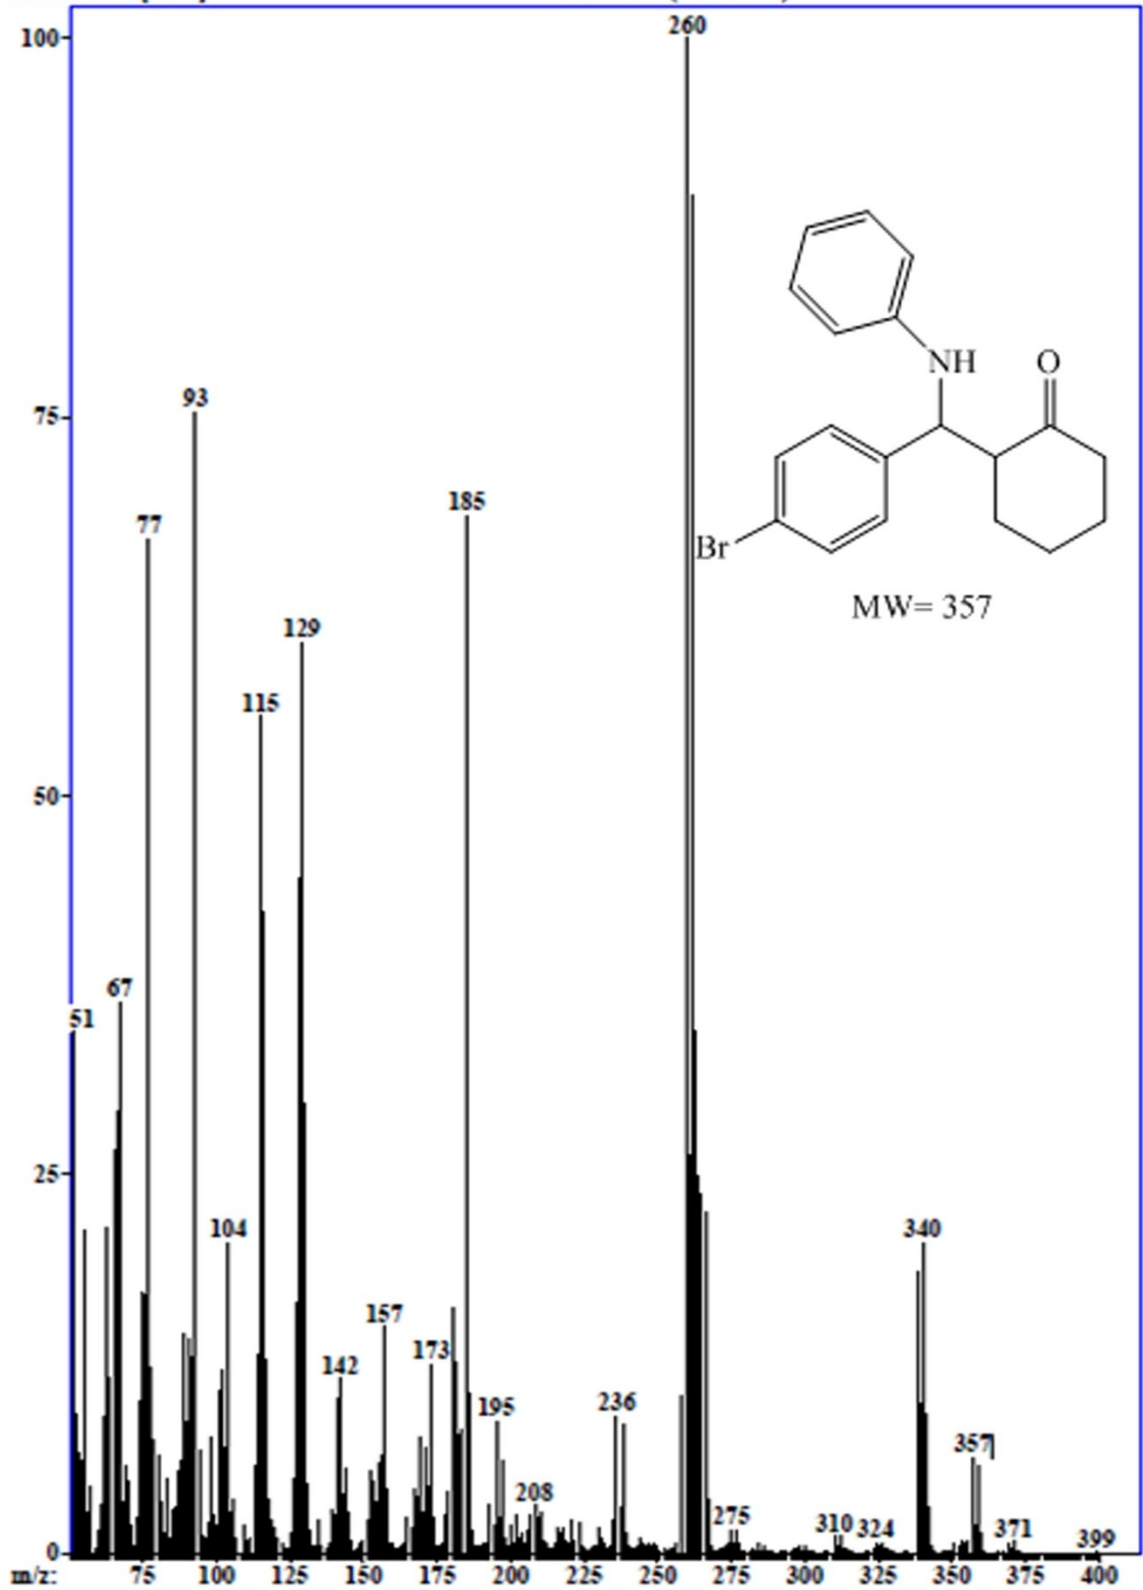

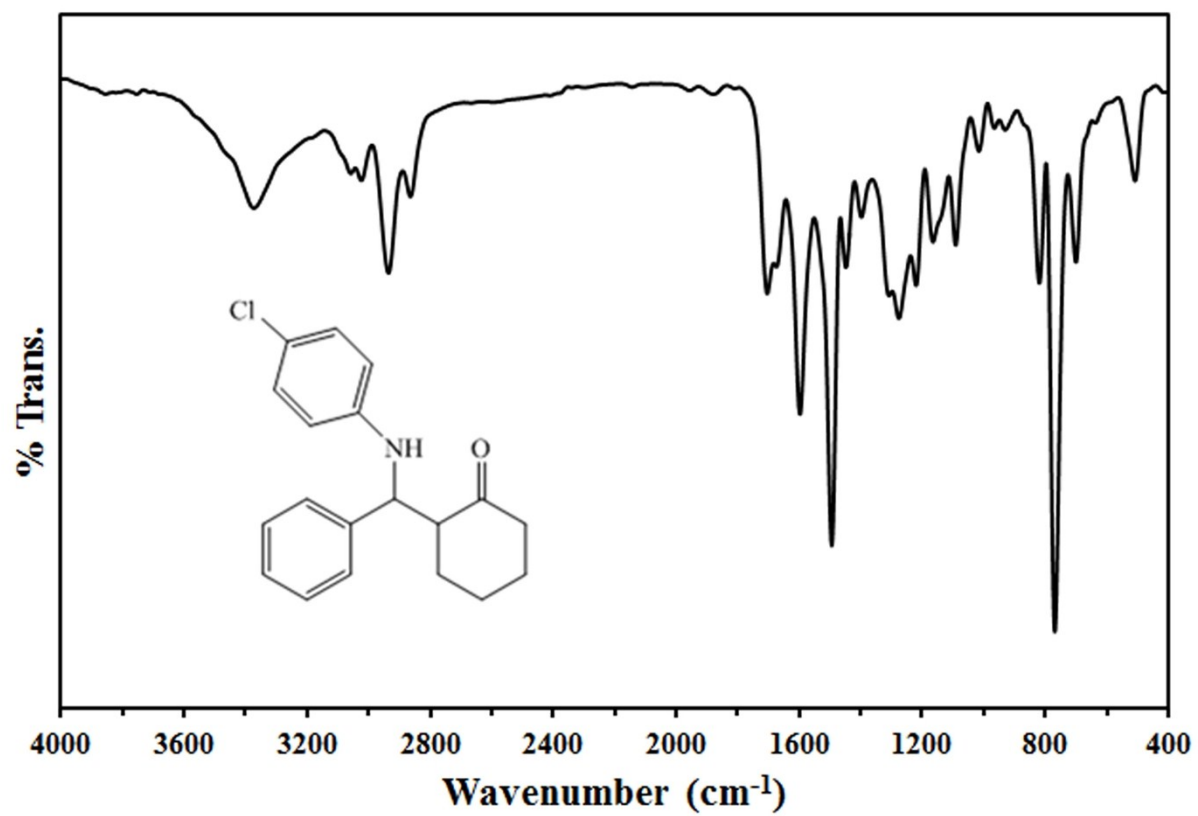

Abundance [1799]

Scan 175 (1.742 min)

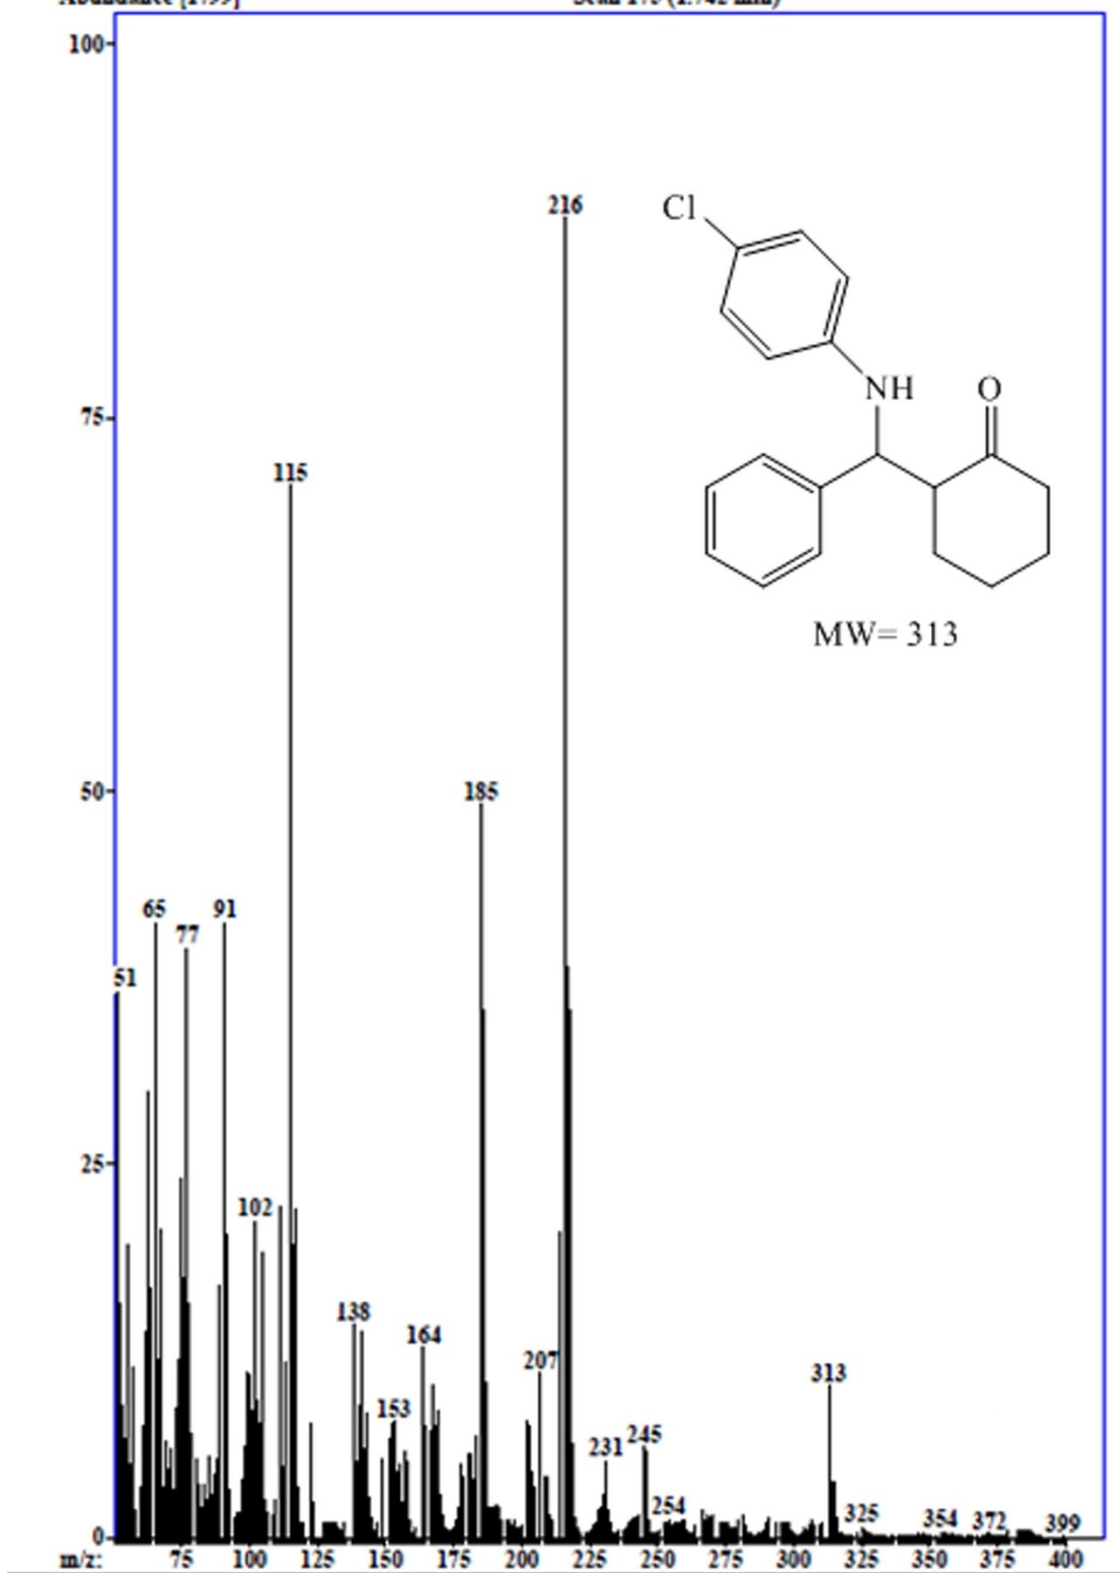

### ***Detailed XRD analysis***

XRD patterns of starting materials of  $\beta$ - $\text{SiW}_9\text{O}_{34}^{10-}$  (Fig. Sa) and PDA are crystalline in the solid state, while X-ray powder diffractions show that HybPOM is typical amorphous state, implying that the hybrid materials have less-ordered structures (Fig. Sb). However, it can see XRD of HybPOM contain XRD pattern of both  $\beta$ - $\text{SiW}_9\text{O}_{34}^{10-}$  and PPD. X-ray diffraction (XRD) measurements were also performed to obtain crystalline structural information for the GO, GO- $\text{Fe}_3\text{O}_4$ , GO@ $\text{Fe}_3\text{O}_4$ @HybPOM. The broad diffraction peak around  $18.72^\circ$  corresponds to C (002) reflection of GO (Fig. S inset). For the GO- $\text{Fe}_3\text{O}_4$  the intense diffraction peaks indexed to (220), (311), (400), (422), (511), (440), and (533) planes appearing at  $2\theta = 30.52^\circ, 35.85^\circ, 43.58^\circ, 53.96^\circ, 57.43^\circ, 63.16^\circ$  and  $74.65^\circ$  respectively, and the peak positions and relative intensities match well with the standard XRD data for the cubic phase  $\text{Fe}_3\text{O}_4$  with a face-centered cubic (fcc) structure (JCPDS No. 19-629) (Fig. Sc).<sup>31</sup> Disappearance of the reflection plane at (002) and merging of the planes of  $\text{Fe}_3\text{O}_4$  show the good interfacial interaction between the planes. The XRD of GO@ $\text{Fe}_3\text{O}_4$ @HybPOM show corresponding peaks of the GO- $\text{Fe}_3\text{O}_4$  and the amorphous XRD pattern of HybPOM as background, respectively (Fig. Sd).

R. Khoshnavazi, L. Bahrami and F. Havasi, *RSC Adv.*, 2016, **6**, 100962.

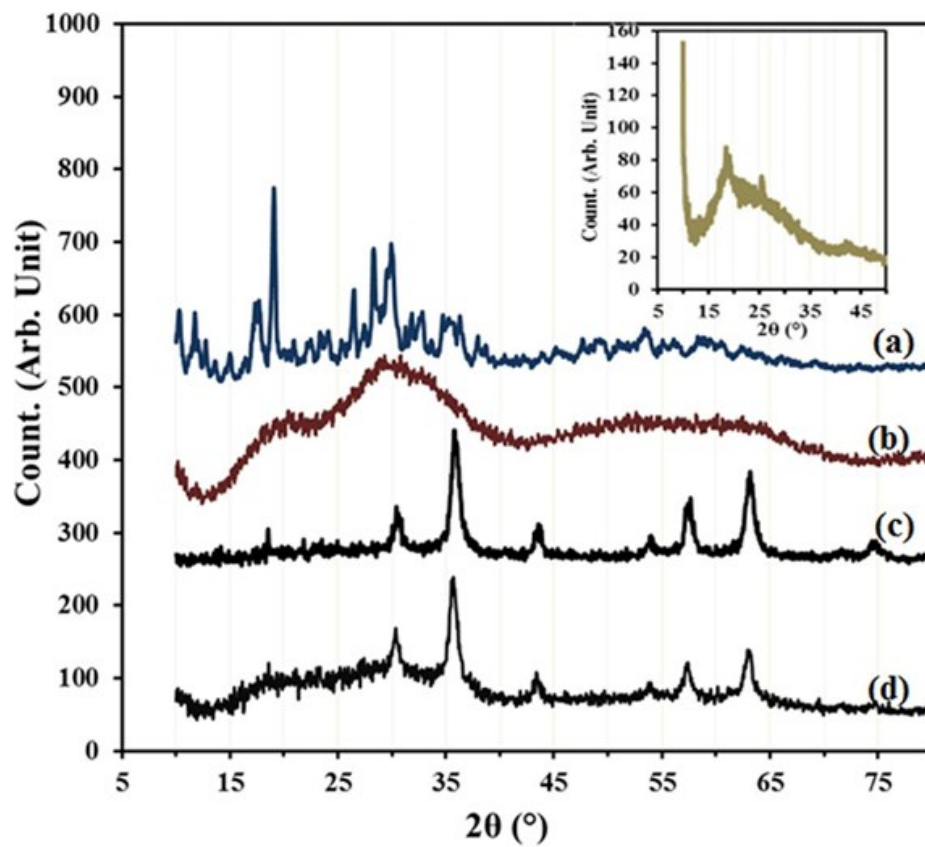

Fig. S XRD spectra of (a)  $\text{Na}_9\text{H}[\beta\text{-XW}_9\text{O}_{34}] \cdot n\text{H}_2\text{O}$ , (b) HybPOM, (c)  $\text{GO}@\text{Fe}_3\text{O}_4$  (d)  $\text{GO}@\text{Fe}_3\text{O}_4@\text{HybPOM}$  and GO(inset).

R. Khoshnavazi, L. Bahrami and F. Havasi, *RSC Adv.*, 2016, **6**, 100962.
